# Supplementary material for: Tunable electronic properties and band alignments of InS–arsenene heterostructures via external strain and electric field
Source: Royal Society of Chemistry journal article supplement (doi:10.1039/d0nj05787h), 2020-12-28

Electronic Supplementary Material (ESI) for New Journal of Chemistry.

**Supplementary data to**  
**Tunable electronic properties and band alignments of InS-arsenene**  
**heterostructure via external strain and electric field**

Hui Yao,<sup>a,b</sup> Chao Zhang,<sup>c</sup> Qiang Wang,<sup>a</sup> Jianwei Li,<sup>a</sup> Yunjin Yu,<sup>a</sup> Fuming Xu,<sup>†a</sup> Bin Wang<sup>\*a</sup> and Yadong Wei <sup>a</sup>

<sup>a</sup> *Shenzhen Key Laboratory of Advanced Thin Films and Applications, College of Physics and Optoelectronic Engineering, Shenzhen University, Shenzhen, 518060, China.*

<sup>b</sup> *Key Laboratory of Optoelectronic Devices and Systems of Ministry of Education and Guangdong Province, College of Optoelectronic Engineering, Shenzhen University, Shenzhen, 518060, China.*

<sup>c</sup> *Beijing Computational Science Research Center, Beijing, 100193, China.*

E-mail address: [binwang@szu.edu.cn](mailto:binwang@szu.edu.cn); [xufuming@szu.edu.cn](mailto:xufuming@szu.edu.cn).

## Supplementary Figures

**Figure S1.**(color online) Top and side views of InS-Arsenene vdWH with different stacking patterns. (a) The first As atom of upper arsenene layer align with S atom, (b) The first As atom of upper arsenene layer align with In atom, (c) The first As atom of lower arsenene layer align with S atom, (d) The first As atom of lower arsenene layer align with In atom. The I stacking pattern has the lowest binding energy.

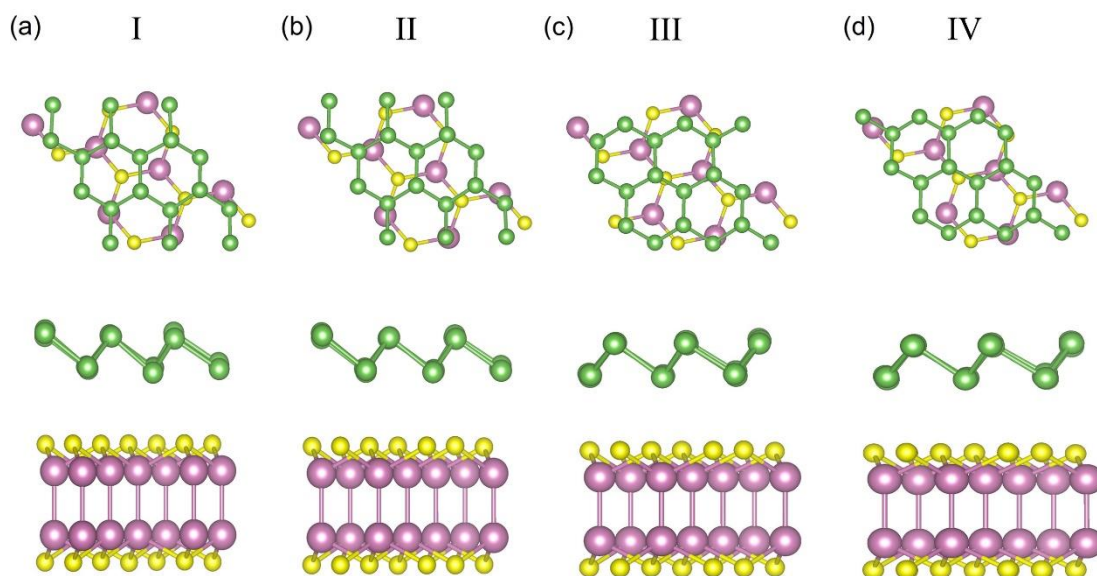

| Stacking patterns      | I      | II     | III    | IV    |
|------------------------|--------|--------|--------|-------|
| Binding Energy (meV/Å) | -113.2 | -112.4 | -111.9 | 111.3 |

**Figure S2.**(color online) The left column : elastic modulus  $C_{2D}$ , and right column: deformation potential constant  $E_{DP}$  at different directions for isolated InS monolayer, arsenene monolayer and InS-arsenene vdWH.

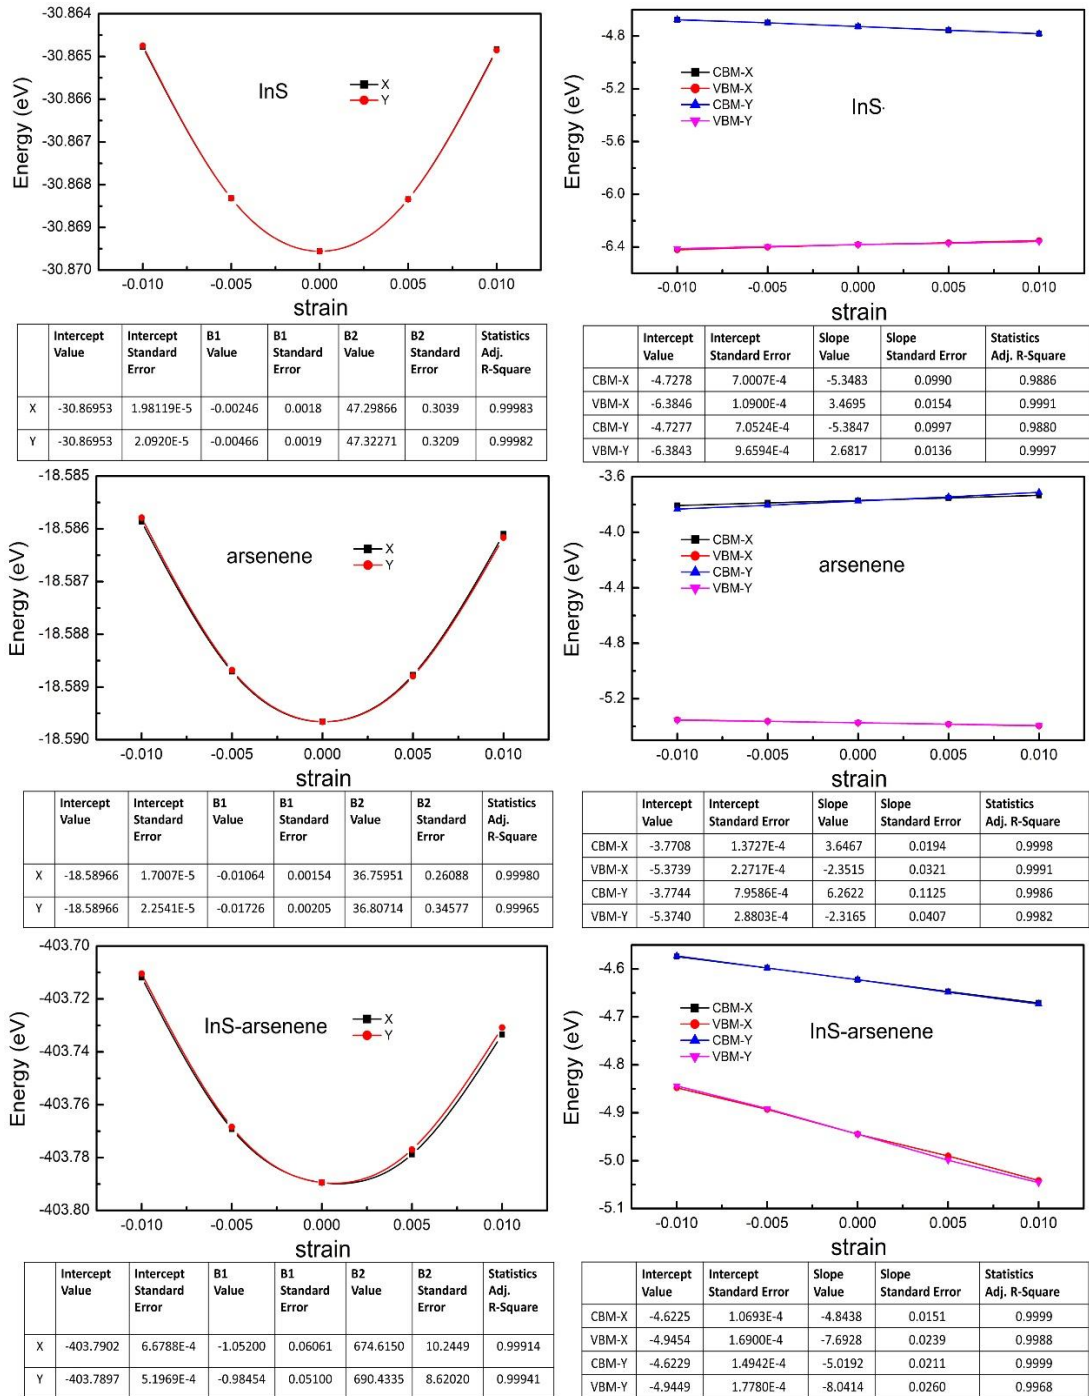

**Figure S3.**(color online) The band structures of (a) InS monolayer, (b) arsenene(As) monolayer and (c) InS-As vdWH at HSE level. In each panel, the Fermi level is set to zero.

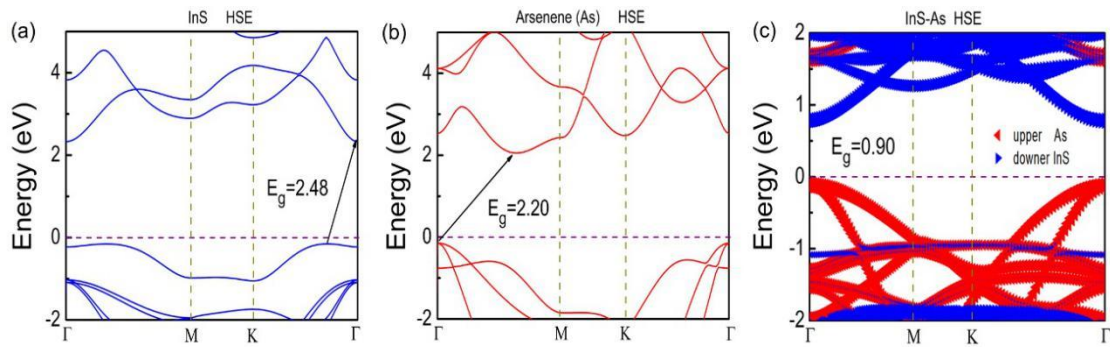

**Figure S4.** (color online) The projected band structures of InS-As vdWH under finite vertical strains (a)  $\Delta d = -0.8 \text{ \AA}$ , (b)  $\Delta d = 0.4 \text{ \AA}$  and (c)  $\Delta d = 1.8 \text{ \AA}$  at HSE level. In each panel, the Fermi level is set to zero.

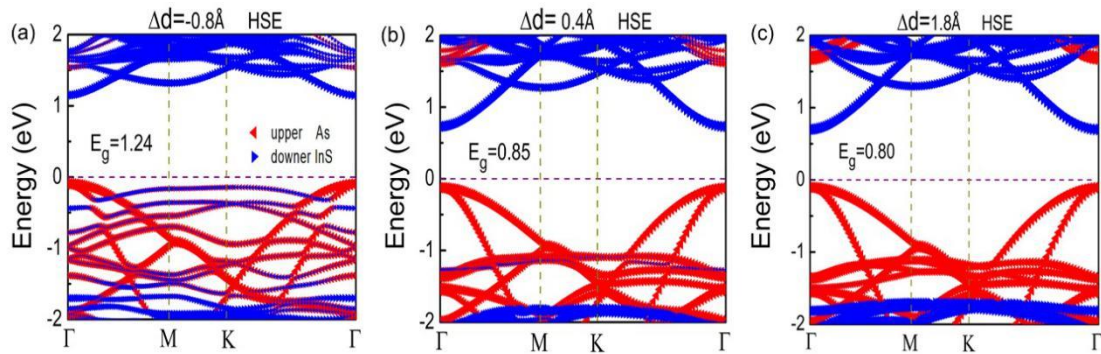

**Figure S5.** (color online) The projected band structures of InS-As vdWH under finite in-plane strains (a)  $\varepsilon = -8\%$ , (b)  $\varepsilon = 2\%$  and (c)  $\varepsilon = 4\%$  at HSE level. In each panel, the Fermi level is set to zero.

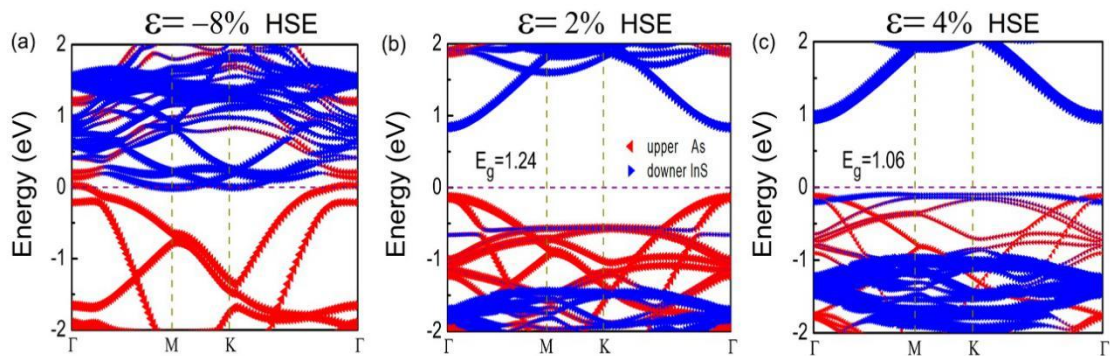

**Figure S6.** (color online) The projected band structures of InS-As vdWH under finite electric fields (a)  $E_{ext} = -0.5 \text{ V/\AA}$ , (b)  $E_{ext} = 0.6 \text{ V/\AA}$  and (c)  $E_{ext} = 0.8 \text{ V/\AA}$  at PBE level and (d)  $E_{ext} = -0.8 \text{ V/\AA}$ , (e)  $E_{ext} = 0.6 \text{ V/\AA}$  and (f)  $E_{ext} = 0.8 \text{ V/\AA}$  at HSE level. In each panel, the Fermi level is set to zero.

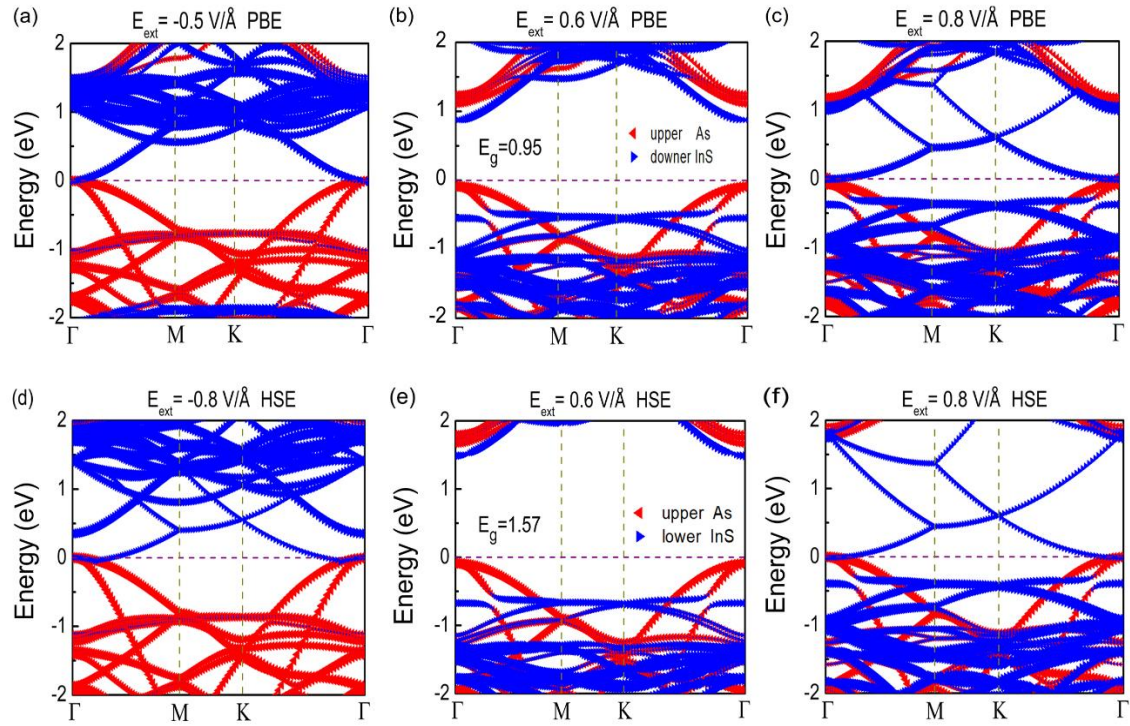

Supplement: d0nj05787h1.pdf [file d0nj05787h1.pdf]
